# Supplementary material for: Structural Basis of Zika Virus Specific Neutralization in Subsequent Flavivirus Infections
Source: MDPI journal article supplement (doi:10.3390/v12121346), 2020-11-24
Supplement: s1 [file s1]

**Supplementary information to accompany:**

**Structural basis of zika virus specific neutralization in  
subsequent flavivirus infections**

Madhumati Sevvana,<sup>1</sup> Thomas F. Rogers,<sup>2</sup> Andrew S. Miller,<sup>1</sup> Feng Long,<sup>1</sup> Thomas Klose,<sup>1</sup>  
Nathan Beutler,<sup>2</sup> Yen-Chung Lai,<sup>2</sup> Mara Parren,<sup>2</sup> Laura M. Walker,<sup>3</sup> Geeta Buda,<sup>1</sup> Dennis R.  
Burton,<sup>2,4</sup> Michael G. Rossmann<sup>1</sup> and Richard J. Kuhn,<sup>1,5\*</sup> and

**Supplementary information consists of:**

**Figures S1-S7**

**Tables S1 and S2**

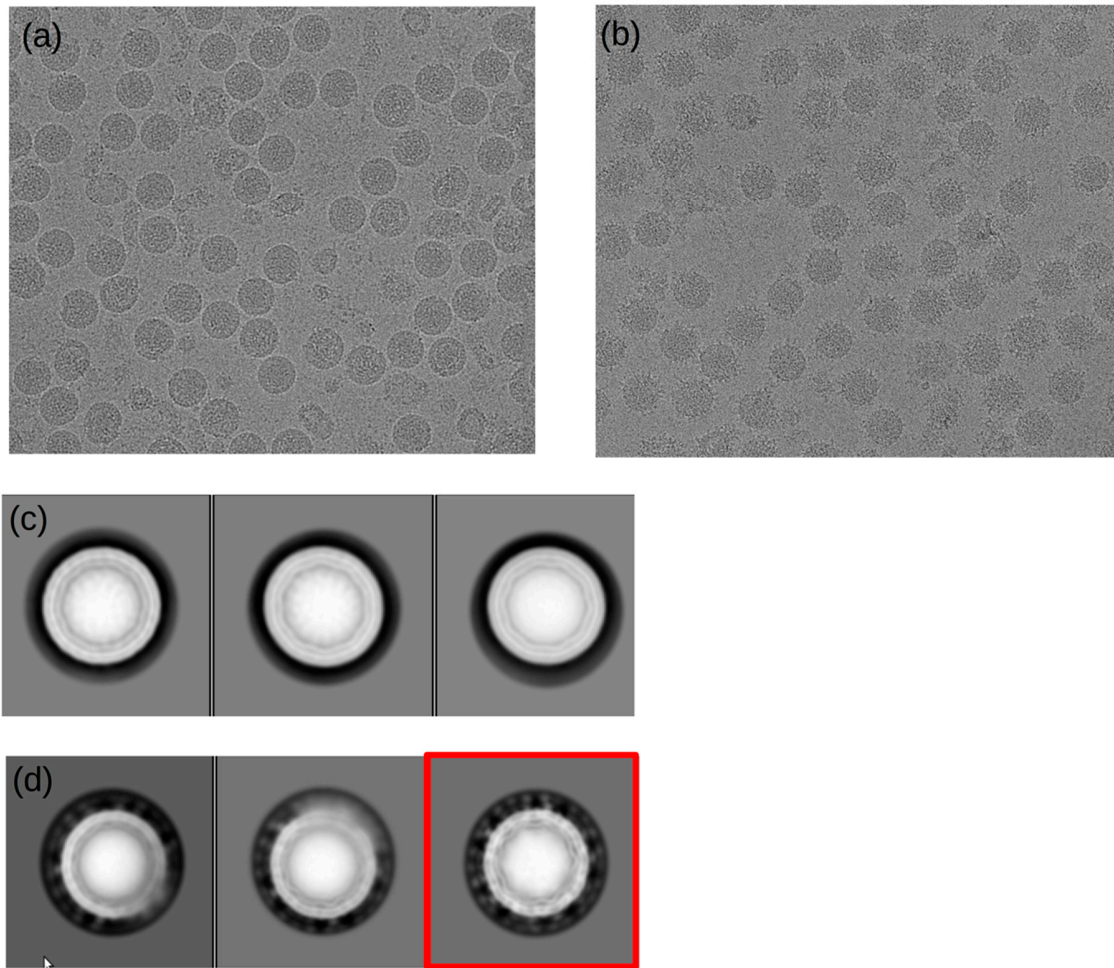

**Figure S1. Micrographs and 2D Classifications of Native ZIKV and ZIKV in Complex with ADI-Fab30056**

(a) and (c) Native ZIKV micrograph and 2D classification (b) and (d) Micrograph and 2D classification of ZIKV in complex with ADI-Fab30056. The class selected for ZIKV-Fab complex reconstruction is highlighted in red.

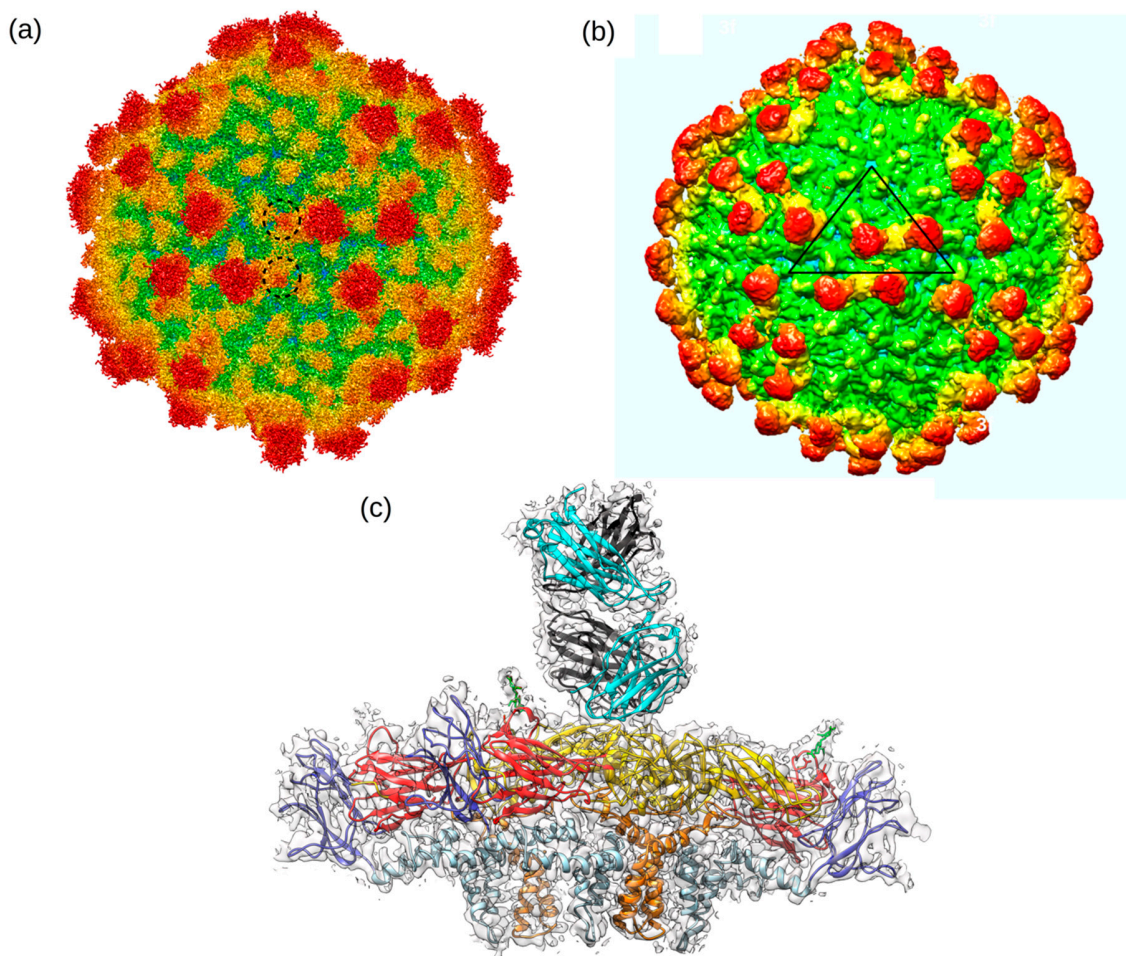

**Figure S2. Comparison of Cryo-EM Maps of ZIKV in complex with ADI-30056 and ZIKV-117**

(a) ZIKV in complex with ADI-Fab30056 at a resolution of 4.0 Å viewed down an icosahedral 2-fold axis contoured at 1.5  $\sigma$ , (b) ZIKV in complex with ZIKV117 at a resolution of 6.3 Å, (c) Map contoured at 3  $\sigma$  around the E proteins and ADI-Fab30056.

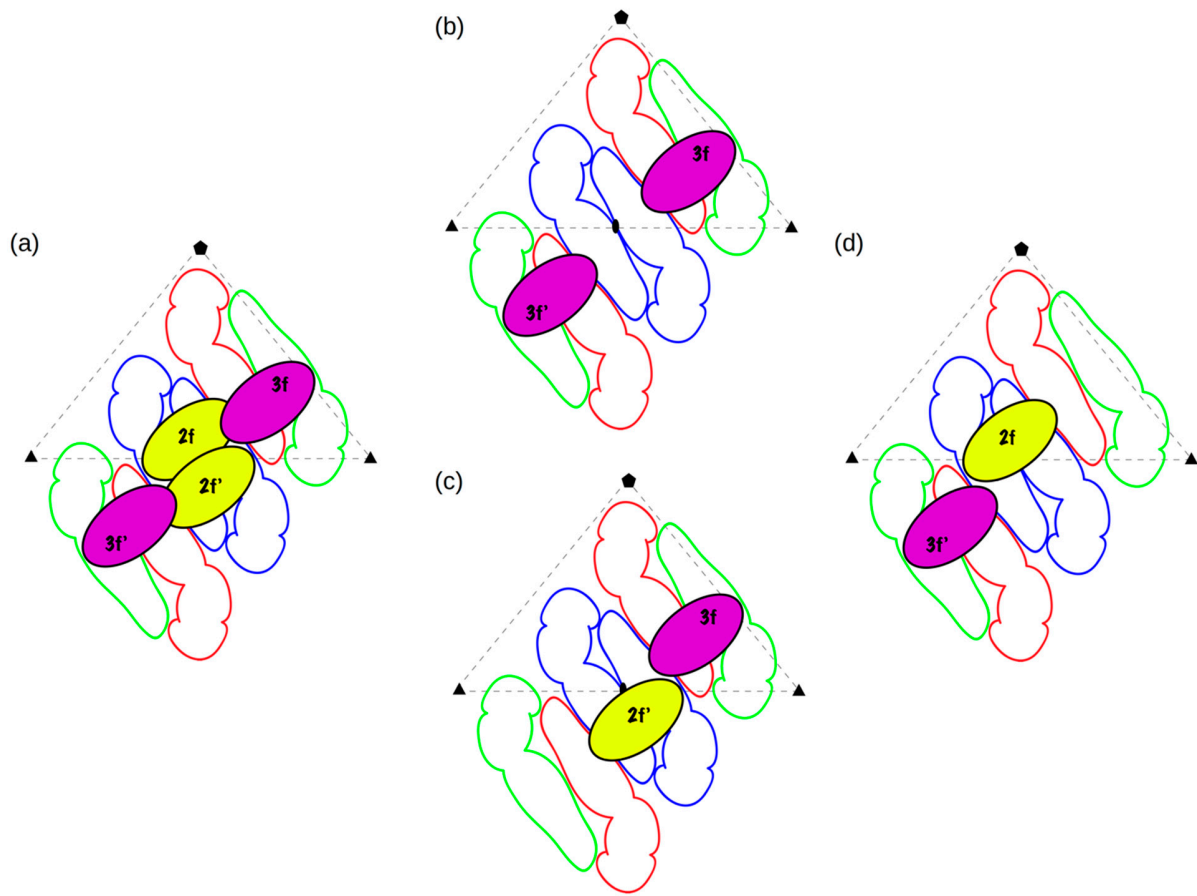

**Figure S3. ADI-Fab30056 binding scenarios**

(a) Fab binding state on an icosahedrally averaged map of ZIKV in complex with ADI-Fab30056. The icosahedral asymmetric unit in ZIKV consisting of three E monomers, ZE2, ZE5, and ZE3 are colored in blue, red and green, respectively. The Fabs binding near the 2-fold, 3-fold and 5-fold axes are named 2f, 3f and 5f Fabs, respectively. Two adjacent asymmetric units consisting of three E protein dimers form a raft. (b) The 3f-3f' possible Fab binding state. (c) The 3f-2f' possible Fab binding state. (d) The 3f'-2f possible Fab binding state.

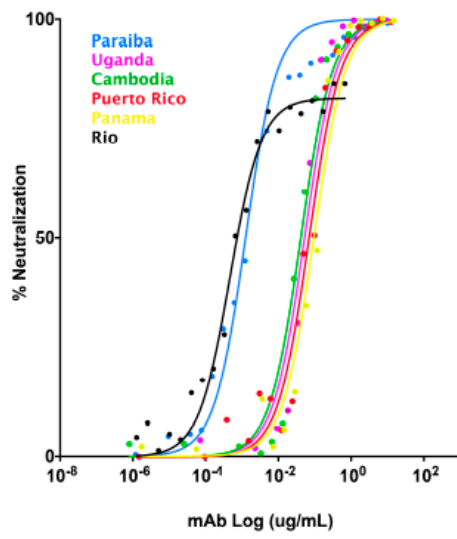

**Figure S4. ADI-30056 Binding to ZIKV**

Focus reduction neutralization test of different ZIKV strains using ADI-30056 IgG.

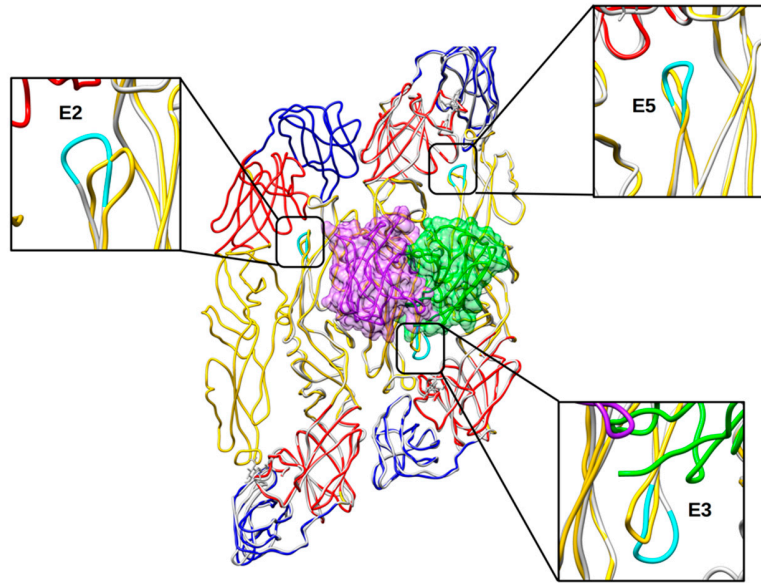

**Figure S5. Superposition of ZIKV-ADI-Fab30056 and Native ZIKV Structure**

The displaced i-j loop in the uncomplexed ZIKV structure is colored in cyan. The E protein domains I, II and III are colored red, yellow and blue, respectively. The Fab heavy and light chains are colored in magenta and green, respectively.



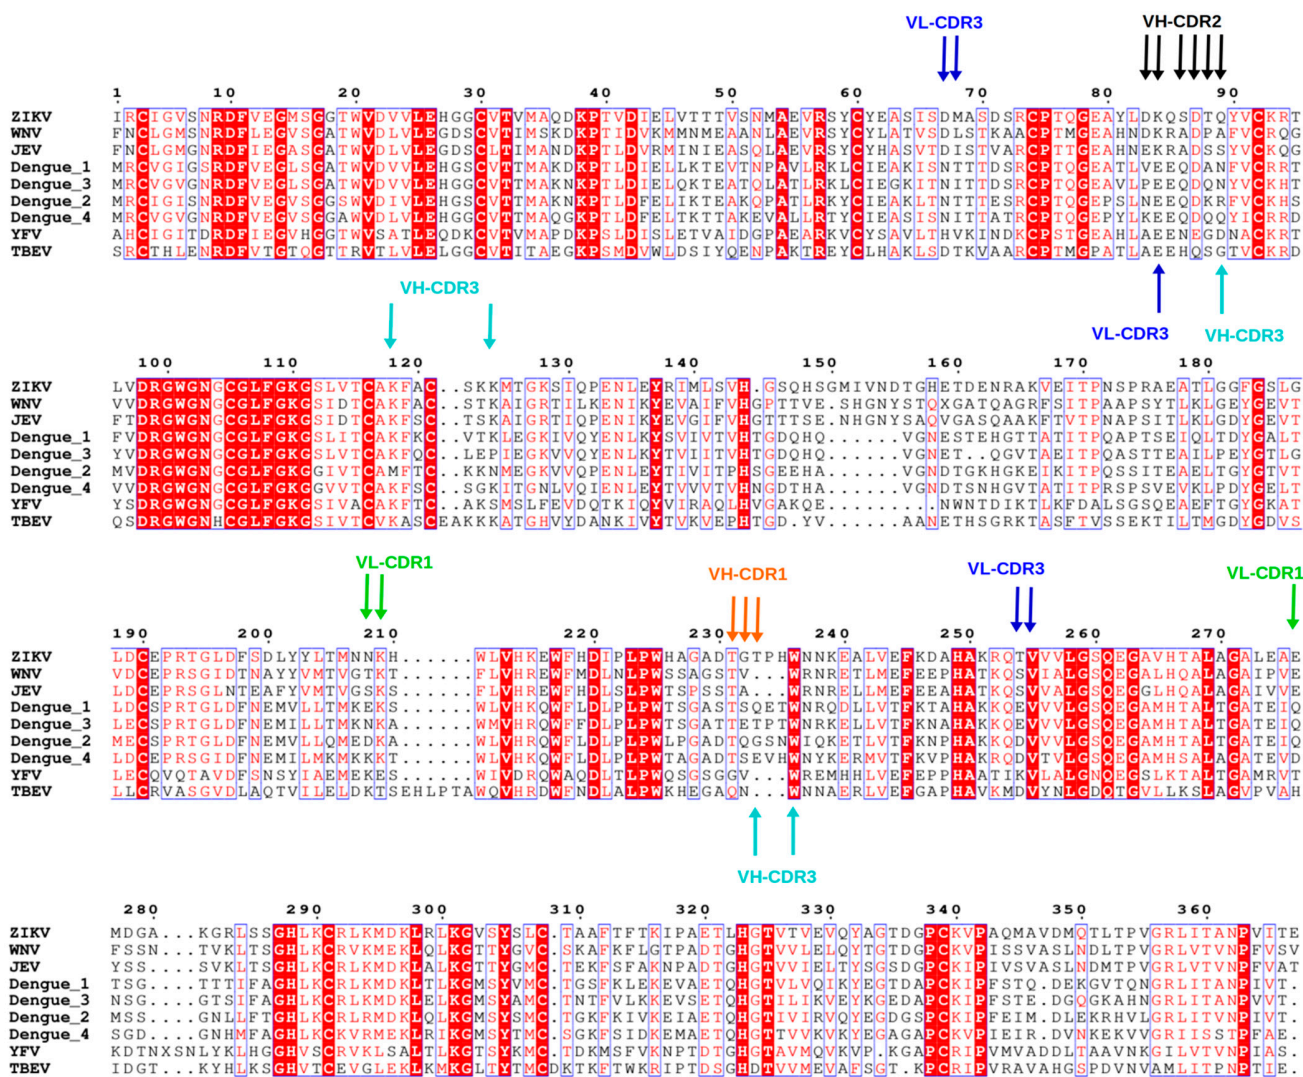

**Figure S6. Multiple Sequence Alignment of Different Flavivirus Consensus Sequences**

The Fab VH and VL-CDR loop interacting residues are labelled and highlighted using arrows.

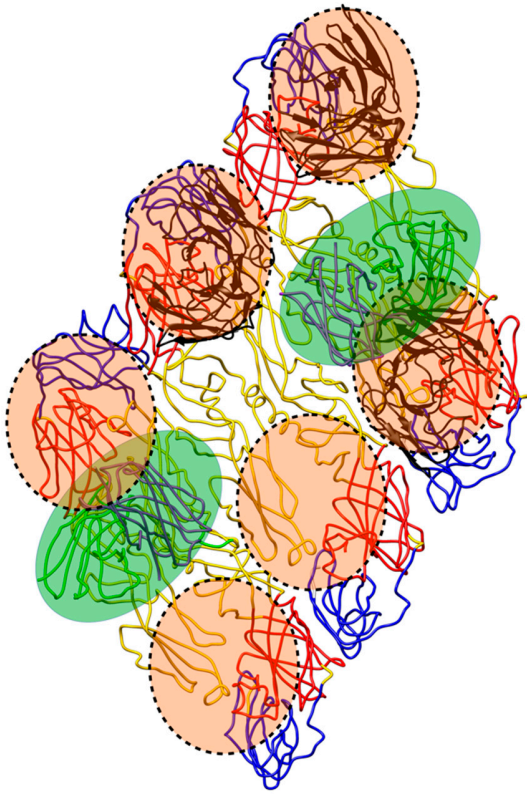

**Figure S7.** The Accessibility of Ab C10 (orange ovals) upon binding of ADI-Fab30056 at the 3f-3f' position (green ovals) on the raft. Color coding of the E protein is the same as in Figure 1.



**Table S1.** Sequence variation among flavivirus E proteins at ADI-Fab30056-CDR interacting regions

| <b>Fab-V-loops</b> | <b>ZIKV</b> | <b>WNV</b> | <b>JEV</b> | <b>DENV1</b> | <b>DENV2</b> | <b>DENV3</b> | <b>DENV4</b> | <b>YFV</b> |
|--------------------|-------------|------------|------------|--------------|--------------|--------------|--------------|------------|
| <b>VH-CDR1</b>     | T231        | -          | -          | T            | T            | T            | T            | -          |
|                    | G232        | -          | -          | S            | Q            | E            | S            | -          |
|                    | T233        | -          | -          | Q            | G            | T            | E            | -          |
|                    | D83         | D          | D          | V            | N            | P            | K            | A          |
| <b>VH-CDR2</b>     | D83         | D          | E          | V            | N            | P            | K            | A          |
|                    | K84         | K          | K          | E            | E            | E            | E            | E          |
|                    | S86         | R          | R          | E            | E            | E            | E            | E          |
|                    | D87         | D          | D          | D            | D            | D            | D            | E          |
|                    | T88         | P          | S          | A            | K            | Q            | Q            | G          |
| <b>VH-CR3</b>      | Q89         | A          | S          | N            | R            | N            | Q            | D          |
|                    | K118        | K          | K          | K            | M            | K            | K            | K          |
|                    | K124        | K          | K          | K            | N            | P            | K            | S          |
|                    | T233        | -          | -          | Q            | G            | T            | E            | -          |
| <b>VL-CDR1</b>     | N208        | T          | S          | E            | D            | N            | K            | K          |
|                    | E276        | E          | E          | Q            | Q            | Q            | D            | T          |
| <b>VL-CDR3</b>     | I65         | V          | V          | I            | L            | I            | I            | L          |
|                    | D67         | D          | D          | N            | N            | N            | N            | H          |
|                    | M68         | L          | I          | T            | T            | T            | T            | V          |
|                    | K84         | K          | K          | E            | E            | E            | E            | E          |
|                    | T254        | S          | S          | E            | E            | D            | D            | K          |
|                    | V255        | V          | V          | V            | V            | V            | V            | V          |

**Table S2.** CDR loop residues interacting with ZIKV are shown in red font.

| Fab-V-Loops | Fab residues                                        |
|-------------|-----------------------------------------------------|
| VH-CDR1     | FTF <b>R</b> NFGIH                                  |
| VH-CDR2     | F <b>I</b> <b>R</b> YDG <b>R</b> <b>N</b> KYYADSVKG |
| VH-CDR3     | ARDG <b>E</b> <b>E</b> TSPGSFDY                     |
| VL-CDR1     | RASE <b>S</b> V <b>S</b> TVLN                       |
| VL-CDR2     | AASTLPS                                             |
| VL-CDR3     | QQ <b>S</b> Y <b>F</b> <b>S</b> P <b>R</b> T        |
